# Supplementary material for: Rural-Urban Disparities in Early Childhood Development: Insights from Interpretable Ensemble Machine Learning Model
Source: Research Square preprint supplement (doi:10.21203/rs.3.rs-8615011/v1), 2026-02-02
Supplement: Supplementary file 1 [file dc29b5d71c96f04cf775bbd2.docx]

**SUPPLEMENTARY FILE**

| Algorithm 1: AutoGluon-Tabular Training Strategy (multi-layer stack ensembling + n-repeated k-fold bagging). (Erickson et al.,2020) |
| --- |
| **Require:** data (X, Y), family of models M, # of layers L1  Preprocess data to extract features  **for** *l = 1* **to *L* do {**Stacking}   - **for** *i =* 1 **to** n **do {**n-repeated} - Randomly split data into *k* chunks - **for *j =* 1** to k **do {*k*-**fold bagging} - **for each** model type m in M **do** - Train a type – m model on *X-j, Y-j* - Make predictions *Ŷjm,i*  on OOF data *Xj* - **end for** - **end for** - **end for** - Average OOF predictions ∑I *Ŷjm, i*}*kj*=1 - X concatenate (X, {m ε M   **end for** |
